# Supplementary material for: Breastfeeding Practices, Infant Formula Use, Complementary Feeding and Childhood Malnutrition: An Updated Overview of the Eastern Mediterranean Landscape
Source: MDPI journal article supplement (doi:10.3390/nu14194201), 2022-10-09
Supplement: s1 [file s1]

**Table S1:** National, regional, and global prevalence of feeding patterns and malnutrition among under 5 years children.

| Countries                                               | Prevalence of infant feeding |               |         |               |           |             | Prevalence of malnutrition |                  |              |                |             | References             |
|---------------------------------------------------------|------------------------------|---------------|---------|---------------|-----------|-------------|----------------------------|------------------|--------------|----------------|-------------|------------------------|
|                                                         | EvBF (%)                     | EBF (%)       | BOT (%) | CBF (%)       | MixMF (%) | ISSSF (%)   | Stunting (%)               | Under-weight (%) | Wasting (%)  | Overweight (%) | Obesity (%) |                        |
| Afghanistan (2018)                                      | NA                           | 57.5          | NA      | NA            | NA        | NA          | 38.2                       | NA               | 5.1          | 4.1            | NA          | [36]                   |
| Afghanistan (2015)                                      | NA                           | NA            | NA      | NA            | NA        | 56          | NA                         | NA               | NA           | NA             | NA          | [38]                   |
| Afghanistan (2014)                                      | NA                           | NA            | NA      | NA            | NA        | NA          | NA                         | NA               | 28.3         | NA             | NA          | [98]                   |
| Afghanistan (UNICEF/WHO/World Bank database, 2000-2020) | NA                           | In 2018: 57.5 | NA      | In 2015: 73.8 | NA        | In 2015: 61 | In 2020: 35.1              | In 2018: 19.1    | In 2018: 5.1 | In 2020: 3.9   | NA          | [35,37,92,99,104, 106] |
| Bahrain (2009)                                          | NA                           | NA            | NA      | NA            | NA        | NA          | NA                         | NA               | NA           | 9.9            | 6.5         | [107]                  |
| Bahrain (UNICEF/WHO/World Bank database, 2000-2020)     | NA                           | NA            | NA      | NA            | NA        | NA          | In 2020: 5.1               | In 1995: 7.6     | In 1995: 6.6 | In 2020: 6.4   | NA          | [35,37,92,99,104, 106] |
| Djibouti (2012)                                         | NA                           | 12.4          | NA      | NA            | NA        | NA          | 33.5                       | NA               | 21.5         | 8.1            | NA          | [39]                   |

[illegible]

| Countries                                         | Prevalence of infant feeding |                                 |         |                                |                               |               | Prevalence of malnutrition |                  |              |                |             | References             |
|---------------------------------------------------|------------------------------|---------------------------------|---------|--------------------------------|-------------------------------|---------------|----------------------------|------------------|--------------|----------------|-------------|------------------------|
|                                                   | EvBF (%)                     | EBF (%)                         | BOT (%) | CBF (%)                        | MixMF (%)                     | ISSSF (%)     | Stunting (%)               | Under-weight (%) | Wasting (%)  | Overweight (%) | Obesity (%) |                        |
| Egypt (2012)                                      | 100                          | 29.9                            | NA      | NA                             | NA                            | 63.6          | NA                         | NA               | NA           | NA             | NA          | [28]                   |
| Egypt (2010)                                      | 95.8                         | 9.7                             | NA      | NA                             | 86.1                          | NA            | NA                         | NA               | NA           | NA             | NA          | [27]                   |
| Egypt (2008)                                      | NA                           | NA                              | NA      | NA                             | NA                            | NA            | In 2008: 28.9              | In 2008: 6       | In 2008: 7.2 | NA             | NA          | [100]                  |
| Egypt (UNICEF/WHO/World Bank database, 2000-2020) | NA                           | In 2014: 39.5                   | NA      | In 2014: 50.5                  | NA                            | In 2014: 75.2 | In 2020: 22.3              | In 2014: 7       | In 2014: 9.5 | In 2020: 17.8  | NA          | [35,37,92,99,104, 106] |
| Iran (2018)                                       | NA                           | NA                              | NA      | NA                             | NA                            | NA            | 8.45                       | 7.63             | 8.04         | 1.23           | NA          | [102]                  |
| Iran (2014-2015)                                  | 98.6                         | At discharge: 74.3<br>At 6m: 28 | NA      | NA                             | At discharge: 23<br>At 6m: 87 | NA            | NA                         | NA               | NA           | NA             | NA          | [46]                   |
| Iran (2011)                                       | NA                           | NA                              | NA      | NA                             | NA                            | NA            | 7.3                        | 2.3              | 1.4          | 5.1            | 1.3         | [108]                  |
| Iran (2010)                                       | NA                           | 53.1                            | NA      | Up to 1y: 84.2<br>Up to 2y: 51 | NA                            | 75.9          | 6.8                        | NA               | 4            | NA             | NA          | [47]                   |

[illegible]

| Countries                                        | Prevalence of infant feeding |                                        |                            |                                           |                                       |               | Prevalence of malnutrition     |                  |              |                             |             | References             |
|--------------------------------------------------|------------------------------|----------------------------------------|----------------------------|-------------------------------------------|---------------------------------------|---------------|--------------------------------|------------------|--------------|-----------------------------|-------------|------------------------|
|                                                  | EvBF (%)                     | EBF (%)                                | BOT (%)                    | CBF (%)                                   | MixMF (%)                             | ISSSF (%)     | Stunting (%)                   | Under-weight (%) | Wasting (%)  | Overweight (%)              | Obesity (%) |                        |
| Iraq (2016)                                      | NA                           | NA                                     | NA                         | NA                                        | NA                                    | NA            | 20.6                           | 7.6              | 6.6          | NA                          | NA          | [117]                  |
| Iraq (2015)                                      | 88.5                         | 27                                     | NA                         | NA                                        | NA                                    | NA            | NA                             | NA               | NA           | NA                          | NA          | [54]                   |
| Iraq (2012-2013)                                 | NA                           | 31                                     | 34                         | 35                                        | NA                                    | 78            | NA                             | NA               | NA           | NA                          | NA          | [53]                   |
| Iraq (2009)                                      | NA                           | NA                                     | NA                         | NA                                        | NA                                    | NA            | NA                             | 18.2             | NA           | NA                          | NA          | [116]                  |
| Iraq (2006-2012)                                 | NA                           | In 2006: 35<br>In 2012: 39.7           | In 2006: 37<br>In 2012: 27 | NA                                        | In 2006: 29.8<br>In 2012: 22.5        | NA            | In 2006: 51.2<br>In 2012: 30.9 | NA               | NA           | In 2006: 20<br>In 2012: 7.2 |             | [51]                   |
| Iraq (UNICEF/WHO/World Bank database, 2000-2020) | NA                           | In 2018: 25.8                          | NA                         | In 2018: 35.3                             | NA                                    | In 2018: 84.8 | In 2020: 11.6                  | In 2018: 3.9     | In 2018: 3   | In 2020: 9                  | NA          | [35,37,92,99,104, 106] |
| Jordan (2012-2017)                               | NA                           | In 2017: 25.4                          | NA                         | In 2017: Up to 1y: 36.2<br>Up to 2y: 14.9 | NA                                    | In 2017: 83.4 | In 2012: 7.8                   | NA               | In 2012: 2.4 | In 2012: 4.7                | NA          | [57]                   |
| Jordan (2017)                                    | 71.2                         | 20.9                                   | NA                         | NA                                        | NA                                    | NA            | NA                             | NA               | NA           | NA                          | NA          | [58]                   |
| Jordan (2017)                                    | 87                           | At birth: 51<br>At 1m: 47<br>At 6m: 33 | NA                         | >6m: 50                                   | At birth:36<br>At 1m: 38<br>At 6m: 43 | NA            | NA                             | NA               | NA           | NA                          | NA          | [56]                   |

| Countries                                          | Prevalence of infant feeding |                          |                     |                           |                     |               | Prevalence of malnutrition |                  |              |                |             | References             |
|----------------------------------------------------|------------------------------|--------------------------|---------------------|---------------------------|---------------------|---------------|----------------------------|------------------|--------------|----------------|-------------|------------------------|
|                                                    | EvBF (%)                     | EBF (%)                  | BOT (%)             | CBF (%)                   | MixMF (%)           | ISSSF (%)     | Stunting (%)               | Under-weight (%) | Wasting (%)  | Overweight (%) | Obesity (%) |                        |
| Jordan (2014)                                      | 95                           | 1                        | NA                  | NA                        | NA                  | NA            | NA                         | NA               | NA           | NA             | NA          | [59]                   |
| Jordan (UNICEF/WHO/World Bank database, 2000-2020) | NA                           | In 2017: 25.4            | NA                  | In 2017: 26.1             | NA                  | In 2017: 83.4 | In 2020: 7.3               | In 2019: 2.7     | In 2012: 2.4 | In 2020: 7.1   | NA          | [35,37,92,99,104, 106] |
| Kuwait (2016-2019)                                 | NA                           | NA                       | NA                  | NA                        | NA                  | NA            | NA                         | NA               | NA           | 10.9           | 3.7         | [118]                  |
| Kuwait (2017)                                      | NA                           | NA                       | NA                  | NA                        | NA                  | NA            | 6.4                        | NA               | 2.5          | 5.5            | NA          | [111]                  |
| Kuwait (2015)                                      | 98.1                         | At discharge: 36.5       | At discharge: 26.5  | NA                        | At discharge: 37    | NA            | NA                         | NA               | NA           | NA             | NA          | [32]                   |
| Kuwait (2012-2013)                                 | 90.4                         | At 6m: 26.5              | NA                  | NA                        | NA                  | NA            | NA                         | NA               | NA           | NA             | NA          | [33]                   |
| Kuwait (2007-2008)                                 | NA                           | At 4m : 31<br>At 8m : 26 | At discharge : 8.4  | At 12m : 22<br>At 26m : 2 | At discharge : 59.4 | NA            | NA                         | NA               | NA           | NA             | NA          | [60]                   |
| Kuwait (2007-2008)                                 | 92.5                         | At discharge : 10.5      | At discharge : 15.3 | NA                        | At discharge : 55   | NA            | NA                         | NA               | NA           | NA             | NA          | [34]                   |
| Kuwait (UNICEF/WHO/World Bank                      | NA                           | NA                       | NA                  | NA                        | NA                  | NA            | In 2020: 6                 | In 2014: 3       | In 2017: 2.5 | In 2020: 7.1   | NA          | [35,37,92,99,104, 106] |

[illegible]

| Countries                                           | Prevalence of infant feeding |            |           |                                        |             |                                           | Prevalence of malnutrition                             |                  |                  |                                                          |             | References             |
|-----------------------------------------------------|------------------------------|------------|-----------|----------------------------------------|-------------|-------------------------------------------|--------------------------------------------------------|------------------|------------------|----------------------------------------------------------|-------------|------------------------|
|                                                     | EvBF (%)                     | EBF (%)    | BOT (%)   | CBF (%)                                | MixMF (%)   | ISSSF (%)                                 | Stunting (%)                                           | Under-weight (%) | Wasting (%)      | Overweight (%)                                           | Obesity (%) |                        |
| Lebanon (2003-2004)                                 | NA                           | NA         | NA        | NA                                     | NA          | At 4m: 41.6<br>At 5m: 11.3<br>At 6m: 13.4 | NA                                                     | NA               | NA               | NA                                                       | NA          | [65]                   |
| Lebanon (2000-2004)                                 | NA                           | NA         | NA        | In 2000:<br>At 1y: 34.7<br>At 2y: 10.6 | NA          | NA                                        | In 2004:<br>16.5                                       | NA               | In 2004:<br>6.6  | In 2004:<br>16.7                                         | NA          | [64]                   |
| Lebanon (UNICEF/WHO/World Bank database, 2000-2020) | NA                           | NA         | NA        | In 2004:<br>12-23m: 14.3               | NA          | NA                                        | In 2000:<br>16<br>In 2004:<br>16.5<br>In 2020:<br>10.4 | In 2004: 4.2     | In 2004:<br>6.6  | In 2000:<br>17.6<br>In 2004:<br>16.7<br>In 2020:<br>19.7 | NA          | [35,37,92,99,104, 106] |
| Libya (2016-2017)                                   | NA                           | 38         | NA        | NA                                     | NA          | NA                                        | NA                                                     | NA               | NA               | NA                                                       | NA          | [67]                   |
| Libya (2014)                                        | NA                           | NA         | NA        | NA                                     | NA          | NA                                        | 38.1                                                   | NA               | 10.2             | 29.6                                                     | NA          | [105]                  |
| Libya (1998)                                        | 95.6                         | 0-5m: 44.6 | At 3m: 27 | 6-12m: 25.1                            | At 3m: 26.5 | NA                                        | NA                                                     | NA               | NA               | NA                                                       | NA          | [18]                   |
| Libya (1995)                                        | NA                           | NA         | NA        | NA                                     | NA          | NA                                        | 20.7                                                   | NA               | NA               | NA                                                       | NA          | [119]                  |
| Libya (1995)                                        | NA                           | NA         | NA        | NA                                     | NA          | NA                                        | 20.7                                                   | 4.3              | 3.7              | 16.2                                                     | NA          | [101]                  |
| Libya (UNICEF/WHO/World Bank                        | NA                           | NA         | NA        | NA                                     | NA          | NA                                        | In 2020:<br>43.5                                       | In 2014: 11.7    | In 2014:<br>10.2 | In 2020:<br>25.4                                         | NA          | [35,37,92,99,104, 106] |



| Countries                                           | Prevalence of infant feeding |             |                           |                                              |                |               | Prevalence of malnutrition |                  |              |                |             | References             |
|-----------------------------------------------------|------------------------------|-------------|---------------------------|----------------------------------------------|----------------|---------------|----------------------------|------------------|--------------|----------------|-------------|------------------------|
|                                                     | EvBF (%)                     | EBF (%)     | BOT (%)                   | CBF (%)                                      | MixMF (%)      | ISSSF (%)     | Stunting (%)               | Under-weight (%) | Wasting (%)  | Overweight (%) | Obesity (%) |                        |
| database, 2000-2020)                                |                              |             |                           |                                              |                |               |                            |                  |              |                |             |                        |
| Morocco (2016)                                      | 94.7                         | 57.23       | 0-6m: 30.3<br>6-12m: 17.5 | NA                                           | At birth: 39.4 | NA            | 15.4                       | 6.25             | 3.25         | NA             | NA          | [68]                   |
| Morocco (2003-2017)                                 | NA                           | In 2017: 35 | NA                        | In 2017:<br>Up to 1y: 64.9<br>Up to 2y: 29.7 | NA             | In 2003: 84.4 | In 2017: 15.1              | NA               | In 2017: 2.6 | In 2017: 10.9  | NA          | [69]                   |
| Morocco (UNICEF/WHO/World Bank database, 2000-2020) | NA                           | In 2017: 35 | NA                        | In 2003: 35.1                                | NA             | In 2003: 84.4 | In 2020: 12.9              | In 2017: 2.6     | In 2017: 2.6 | In 2020: 11.3  | NA          | [35,37,92,99,104, 106] |
| Oman (2016-2017)                                    | NA                           | 0-6m: 29    | 0-6m: 44                  | Up to 1y: 79<br>Up to 2y: 51                 | NA             | NA            | NA                         | NA               | NA           | NA             | NA          | [70]                   |
| Oman (2016-2017)                                    | 47                           | 23.2        | 53.2                      | Up to 1y: 80<br>Up to 2y: 47.3               | NA             | 95.3          | 11.4                       | 11.2             | 9.3          | 4.2            |             | [29]                   |
| Oman (2017)                                         | NA                           | 23.2        | NA                        | Up to 1y: 80<br>Up to 2y: 47.3               | NA             | 95.3          | 11.4                       | NA               | 9.3          | 4.2            | NA          | [71]                   |

| Countries                                                              | Prevalence of infant feeding |                            |         |                                        |           |                                     | Prevalence of malnutrition |                  |                 |                 |             | References                 |
|------------------------------------------------------------------------|------------------------------|----------------------------|---------|----------------------------------------|-----------|-------------------------------------|----------------------------|------------------|-----------------|-----------------|-------------|----------------------------|
|                                                                        | EvBF (%)                     | EBF (%)                    | BOT (%) | CBF (%)                                | MixMF (%) | ISSSF (%)                           | Stunting (%)               | Under-weight (%) | Wasting (%)     | Overweight (%)  | Obesity (%) |                            |
| <b>Oman</b><br>(UNICEF/WHO/<br>World Bank<br>database, 2000-<br>2020). | NA                           | In 2017:<br>23.2           | NA      | NA                                     | NA        | In 2017:<br>95.3                    | In 2020:<br>12.2           | In 2017: 11.2    | In 2017:<br>9.3 | In 2020:<br>4.8 | NA          | [35,37,92,99<br>,104, 106] |
| <b>Pakistan (2018)</b>                                                 | NA                           | 48.4                       | NA      | Up to 1y:<br>68.4<br>Up to 2y:<br>56.5 | NA        | 35.9                                | 40.2                       | 28.9             | 17.7            | 9.5             | NA          | [74]                       |
| <b>Pakistan (2018)</b>                                                 | NA                           | 47.8                       | NA      | Up to 1y:<br>69.6<br>Up to 2y:<br>53.4 | NA        | 65.3                                | 37.6                       | NA               | 7.1             | 2.5             | NA          | [73]                       |
| <b>Pakistan (2017-<br/>2018)</b>                                       | NA                           | NA                         | NA      | NA                                     | NA        | NA                                  | 81.1                       | 57.3             | 18.2            | NA              | NA          | [96]                       |
| <b>Pakistan (2014-<br/>2017)</b>                                       | NA                           | At 3m: 74.4<br>At 6m: 30.2 | NA      | Up to 1y:<br>88.3<br>Up to 2y:<br>32.3 | NA        | At 6m: 60.4                         | NA                         | NA               | NA              | NA              | NA          | [72]                       |
| <b>Pakistan (2015)</b>                                                 | 93                           | 12                         | NA      | NA                                     | NA        | At 4m: 21<br>At 4-6m: 55<br>>6m: 18 | NA                         | NA               | NA              | NA              | NA          | [24]                       |
| <b>Pakistan (2014)</b>                                                 | NA                           | NA                         | NA      | NA                                     | NA        | NA                                  | 38.5                       | 33.2             | 19.1            | NA              | NA          | [97]                       |
| <b>Pakistan (2014)</b>                                                 | 99.9                         | <6m: 37                    | 12.3    | Up to 1y:<br>82.5<br>Up to 2y:<br>74.7 | NA        | 6-8m: 70                            | NA                         | NA               | NA              | NA              | NA          | [23]                       |

| Countries                                                   | Prevalence of infant feeding             |                                                                   |                                                        |                                           |           |               | Prevalence of malnutrition |                       |                        |                |             | References             |
|-------------------------------------------------------------|------------------------------------------|-------------------------------------------------------------------|--------------------------------------------------------|-------------------------------------------|-----------|---------------|----------------------------|-----------------------|------------------------|----------------|-------------|------------------------|
|                                                             | EvBF (%)                                 | EBF (%)                                                           | BOT (%)                                                | CBF (%)                                   | MixMF (%) | ISSSF (%)     | Stunting (%)               | Under-weight (%)      | Wasting (%)            | Overweight (%) | Obesity (%) |                        |
| <b>Pakistan (2006-2007)</b>                                 | <24m: 97.6<br><12m: 97.8<br>12-24m: 97.4 | <6m: 37.1<br>0-1m: 54.6<br>2-3m: 35.7<br>4-5m: 23.1<br>0-3m: 44.1 | <24m: 32.1<br><6m: 26.8<br>6-11m: 36.8<br>12-23m: 33.2 | NA                                        | NA        | NA            | NA                         | NA                    | NA                     | NA             | NA          | [25]                   |
| <b>Pakistan (UNICEF/WHO/World Bank database, 2000-2020)</b> | NA                                       | In 2018: 47.8                                                     | NA                                                     | In 2018: 62.8                             | NA        | In 2018: 65.3 | In 2020: 36.7              | In 2018: 23.1         | In 2018: 7.1           | In 2020: 3.4   | NA          | [35,37,92,99,104, 106] |
| <b>Palestine (2014-2020)</b>                                | NA                                       | In 2020: 38.9                                                     | NA                                                     | In 2014: Up to 1y: 52.9<br>Up to 2y: 11.5 | NA        | In 2020: 89.9 | 8.7                        | NA                    | In 2020: 1.3           | In 2020: 8.6   | NA          | [75]                   |
| <b>Palestine (2014)</b>                                     | NA                                       | NA                                                                | NA                                                     | NA                                        | NA        | NA            | NA                         | 1.4                   | NA                     | 7.3            | 1.5         | [109]                  |
| <b>Palestine (2014)</b>                                     | NA                                       | NA                                                                | NA                                                     | NA                                        | NA        | NA            | At 6m: 9<br>At 24m: 20     | At 6m: 5<br>At 24m: 4 | At 6m: 10<br>At 24m: 3 | NA             | NA          | [109]                  |
| <b>Palestine (2012)</b>                                     | NA                                       | NA                                                                | NA                                                     | NA                                        | NA        | NA            | 19.6                       | NA                    | NA                     | NA             | NA          | [121]                  |
| <b>Palestine (2007)</b>                                     | NA                                       | 69.7                                                              | 14.3                                                   | NA                                        | NA        | NA            | NA                         | NA                    | NA                     | NA             | NA          | [76]                   |
| <b>Palestine (2009)</b>                                     | NA                                       | 44.6                                                              | NA                                                     | NA                                        | NA        | NA            | 15                         | 6.1                   | 3.5                    | NA             | NA          | [77]                   |



| Countries                                                | Prevalence of infant feeding |                                                                          |                                                                                                          |                                            |                                                                                                                 |                                       | Prevalence of malnutrition |                  |               |                |             | References          |
|----------------------------------------------------------|------------------------------|--------------------------------------------------------------------------|----------------------------------------------------------------------------------------------------------|--------------------------------------------|-----------------------------------------------------------------------------------------------------------------|---------------------------------------|----------------------------|------------------|---------------|----------------|-------------|---------------------|
|                                                          | EvBF (%)                     | EBF (%)                                                                  | BOT (%)                                                                                                  | CBF (%)                                    | MixMF (%)                                                                                                       | ISSSF (%)                             | Stunting (%)               | Under-weight (%) | Wasting (%)   | Overweight (%) | Obesity (%) |                     |
| Saudi Arabia (2018)                                      | NA                           | 0-6m: 27.6                                                               | NA                                                                                                       | Up to 2y: 20.4                             | 74.3                                                                                                            | NA                                    | NA                         | NA               | NA            | NA             | NA          | [82]                |
| Saudi Arabia (2005)                                      | NA                           | NA                                                                       | NA                                                                                                       | NA                                         | NA                                                                                                              | NA                                    | 10.9                       | 6.9              | 9.8           | NA             | NA          | [122]               |
| Saudi Arabia (2004-2005)                                 | 91.6                         | At birth: 88.6<br>At 1m: 49<br>At 2m: 36.1<br>At 4m: 20.5<br>At 6m: 10.2 | Ever BOT:8.4<br>At birth: 11.4<br>At 1m: 51<br>At 2m: 63.9<br>At 4m: 79.5<br>At 6m: 89.9<br>At 12m: 98.2 | Up to 1y: 1.8                              | At birth: 88.6<br>At 1m: 49<br>At 2m:36.1<br>At 4m:20.5<br>At 6m:10.2<br>At 12m:1.8<br>At 18m:0.4<br>At 24m:0.2 | <4m: 4.2<br>4-6m: 81.5<br>7-12m: 14.3 | NA                         | NA               | NA            | NA             | NA          | [80]                |
| Saudi Arabia (2004)                                      | NA                           | NA                                                                       | NA                                                                                                       | NA                                         | NA                                                                                                              | NA                                    | 9.3                        | NA               | 11.8          | 6.1            | NA          | [123]               |
| Saudi Arabia (UNICEF/WHO/World Bank database, 2000-2020) | NA                           | NA                                                                       | NA                                                                                                       | NA                                         | NA                                                                                                              | NA                                    | In 2020: 3.9               | In 2004: 5.3     | In 2004: 11.8 | In 2020: 7.6   | NA          | [35,92,99,104, 106] |
| Somalia (2009-2018)                                      | NA                           | In 2018: 33.7                                                            | NA                                                                                                       | In 2009: Upt to 1y: 60.8<br>Up to 2y: 26.8 | NA                                                                                                              | In 2018: 41.2                         | In 2009: 25.3              | NA               | In 2009: 14.3 | In 2009: 3     | NA          | [84]                |
| Somalia (2007-2010)                                      | NA                           | NA                                                                       | NA                                                                                                       | NA                                         | NA                                                                                                              | NA                                    | 31                         | NA               | 21            | NA             | NA          | [94]                |

| Countries                                               | Prevalence of infant feeding |               |         |                                  |           |               | Prevalence of malnutrition |                  |               |                |             | References             |
|---------------------------------------------------------|------------------------------|---------------|---------|----------------------------------|-----------|---------------|----------------------------|------------------|---------------|----------------|-------------|------------------------|
|                                                         | EvBF (%)                     | EBF (%)       | BOT (%) | CBF (%)                          | MixMF (%) | ISSSF (%)     | Stunting (%)               | Under-weight (%) | Wasting (%)   | Overweight (%) | Obesity (%) |                        |
| Somalia (2006)                                          | NA                           | 9             | NA      | NA                               | NA        | NA            | 42                         | 36               | 13            | NA             | NA          | [83]                   |
| Somalia (UNICEF/WHO/World Bank database, 2000-2020)     | NA                           | In 2018: 33.7 | NA      | In 2018: 44.6                    | NA        | In 2018: 41.2 | In 2020: 27.4              | In 2009: 22.5    | In 2006: 13.3 | In 2020: 2.9   | NA          | [35,37,92,99,104, 106] |
| Sudan (2018-2019)                                       | NA                           | 62.31         | NA      | Up to 2y: 73.29                  | NA        | NA            | 36.35                      | 29.16            | 13.6          | 2.14           | 0.85        | [85]                   |
| South Sudan (2018)                                      | NA                           | NA            | NA      | NA                               | NA        | NA            | 23.8                       | 4.8              | 2.3           | NA             | NA          | [95]                   |
| Sudan (2014)                                            | 96                           | NA            | NA      | NA                               | NA        | NA            | NA                         | NA               | NA            | NA             | NA          | [22]                   |
| North Sudan (2014)                                      | NA                           | 62.1          | NA      | Up to 2y: 64                     | NA        | NA            | 42.5                       | 32.7             | 21            | NA             | NA          | [86]                   |
| Sudan (2014)                                            | NA                           | 54.6          | NA      | Up to 1y: 89.4<br>Up to 2y: 48.8 | NA        | 61.2          | 38.2                       | NA               | 16.3          | 3              | NA          | [87]                   |
| South Sudan (UNICEF/WHO/World Bank database, 2000-2020) | NA                           | In 2010: 44.5 | NA      | In 2010: 61.9                    | NA        | In 2010: 41.6 | In 2020: 30.6              | In 2010: 27.7    | In 2010: 22.7 | In 2020: 5.7   | NA          | [35,37,92,99,104, 106] |

| Countries                                                                             | Prevalence of infant feeding |                                                      |         |                                        |                                                                    |                                | Prevalence of malnutrition |                  |                  |                  |             | References                 |
|---------------------------------------------------------------------------------------|------------------------------|------------------------------------------------------|---------|----------------------------------------|--------------------------------------------------------------------|--------------------------------|----------------------------|------------------|------------------|------------------|-------------|----------------------------|
|                                                                                       | EvBF (%)                     | EBF (%)                                              | BOT (%) | CBF (%)                                | MixMF (%)                                                          | ISSSF (%)                      | Stunting (%)               | Under-weight (%) | Wasting (%)      | Overweight (%)   | Obesity (%) |                            |
| <b>Sudan</b><br>(UNICEF/WHO/<br>World Bank<br>database, 2000-<br>2020)                | NA                           | In 2014:<br>54.6                                     | NA      | In 2014:<br>72.5                       | NA                                                                 | In 2014:<br>61.2               | In 2020:<br>33.7           | In 2014: 33      | In 2014:<br>16.3 | In 2020: 2.7     | NA          | [35,37,92,99<br>,104, 106] |
| <b>Syrian Arab Republic</b><br>(UNICEF/WHO/<br>World Bank<br>database, 2000-<br>2020) | NA                           | In 2019:<br>28.5                                     | NA      | In 2006:<br>44.7                       | NA                                                                 | In 2019:<br>74.6               | In 2020:<br>29.6           | NA               | In 2010:<br>11.5 | In 2020:<br>18.2 | NA          | [35,37,92,99<br>,104, 106] |
| <b>Syrian Arab Republic</b><br>(2009-<br>2019)                                        | NA                           | In 2019:<br>28.5                                     | NA      | In 2009:<br>At 1y: 55.8<br>At 2y: 24.9 | NA                                                                 | In 2019:<br>74.6               | In 2010:<br>27.9           | In 2010: 10.4    | In 2010:<br>11.5 | In 2010:<br>17.9 | NA          | [88]                       |
| <b>Tunisia (2018)</b>                                                                 | NA                           | 13.5                                                 | NA      | At 1y: 45.4<br>At 2y: 18.2             | NA                                                                 | 96.8                           | 8.4                        | NA               | 2.1              | 17.2             | NA          | [89]                       |
| <b>Tunisia</b><br>(UNICEF/WHO/<br>World Bank<br>database, 2000-<br>2020)              | NA                           | In 2018:<br>13.5                                     | NA      | In 2018:<br>12-23m: 30.3               | NA                                                                 | In 2018:<br>12-23m:<br>96.8    | In 2020:<br>8.6            | In 2018: 1.6     | In 2018:<br>2.1  | In 2020:<br>16.5 | NA          | [35,37,92,99<br>,104, 106] |
| <b>United Arab Emirates</b><br>(2020)                                                 | 95                           | 0-6m: 37<br>0-3.9 m:45<br>4-5.9 m: 26<br>6-11.9 m: 4 | NA      | >1y: 1                                 | 0-3.9m: 45<br>4-5.9 m: 48<br>6-8.9 m: 63<br>9-11.9m: 59<br>>1y: 34 | <4m: 7<br><6m: 19<br>At 6m: 98 | 15                         | NA               | 8                | 7                |             | [16]                       |
| <b>United Arab Emirates</b><br>(2019-<br>2020)                                        | NA                           | NA                                                   | NA      | NA                                     | NA                                                                 | NA                             | 10                         | NA               | 6                | 5                | 3           | [124]                      |

| Countries                                          | Prevalence of infant feeding |                    |         |                                 |           |                     | Prevalence of malnutrition     |                  |              |                |             | References             |
|----------------------------------------------------|------------------------------|--------------------|---------|---------------------------------|-----------|---------------------|--------------------------------|------------------|--------------|----------------|-------------|------------------------|
|                                                    | EvBF (%)                     | EBF (%)            | BOT (%) | CBF (%)                         | MixMF (%) | ISSSF (%)           | Stunting (%)                   | Under-weight (%) | Wasting (%)  | Overweight (%) | Obesity (%) |                        |
| United Arab Emirates (2016)                        | 95.6                         | 0-6m: 44.3         | NA      | NA                              | NA        | ≥6m: 89             | NA                             | NA               | NA           | NA             | NA          | [17]                   |
| Abu Dhabi, United Arab Emirates (2014-2015)        | NA                           | 0-6m: 16.9         | NA      | NA                              | NA        | NA                  | NA                             | NA               | NA           | NA             | NA          | [90]                   |
| Yemen (2013)                                       | NA                           | NA                 | NA      | NA                              | NA        | NA                  | 47                             | 39               | 16           | NA             | NA          | [93]                   |
| Yemen (2013)                                       | NA                           | 9.7                | NA      | At 1y: 71.2<br>At 2y: 45.3      | NA        | 69.2                | 46.4                           | NA               | 16.4         | 2.5            | NA          | [91]                   |
| Yemen (UNICEF/WHO/World Bank database, 2000-2020)  | NA                           | In 2013: 0-5m: 9.7 | NA      | In 2013: 12-24m: 62.8           | NA        | In 2013: 6-8m: 69.2 | In 2013: 46.4<br>In 2020: 37.2 | NA               | In 2013 16.4 | In 2020: 2.7   | NA          | [35,37,92,99,104, 106] |
| EMR (2018)                                         | NA                           | 29.3               | NA      | NA                              | NA        | NA                  | 28                             | 18               | 8.69         | 8.42           |             | [3]                    |
| Global (UNICEF/WHO/World Bank database, 2000-2020) | NA                           | 2014-2020: 44      | NA      | 2014-2020: 65                   | NA        | 2014-2020: 73       | In 2020: 22                    | In 2020: 12.6    | In 2020: 6.7 | In 2020: 5.7   | NA          | [35,37,92,99,104, 106] |
| East Asia and Pacific (2014-2020)                  | NA                           | 2014-2020: 31      | NA      | 2014-2020: 58 (excluding China) | NA        | 2014-2020: 84       | 13.4                           | 5.2              | 3.7          | 7.8            | NA          | [35,37,92,99,104, 106] |



[illegible]
